# Supplementary material for: FeS2@TiO2 nanobelt array enabled high-efficiency electrocatalytic nitrate reduction to ammonia
Source: Royal Society of Chemistry journal article supplement (doi:10.1039/d2ta07475c), 2022-01-01
Supplement: d2ta07475c1.pdf [file d2ta07475c1.pdf]

## Electronic Supplementary Information

### Experimental section

**Materials:** Sodium nitrate ( $\text{NaNO}_3$ , 99.0%), sodium nitrite ( $\text{NaNO}_2$ , 99.0%), ammonium chloride ( $\text{NH}_4\text{Cl}$ ), sodium hydroxide ( $\text{NaOH}$ ), sodium sulfite ( $\text{Na}_2\text{SO}_3$ ), sodium salicylate ( $\text{C}_7\text{H}_5\text{NaO}_3$ ), trisodium citrate dihydrate ( $\text{C}_6\text{H}_5\text{Na}_3\text{O}_7 \cdot 2\text{H}_2\text{O}$ ), p-dimethylaminobenzaldehyde ( $\text{C}_9\text{H}_{11}\text{NO}$ ), sodium nitroferricyanide dihydrate ( $\text{C}_5\text{FeN}_6\text{Na}_2\text{O} \cdot 2\text{H}_2\text{O}$ ), 0.8 wt% sulfamic acid solution ( $\text{H}_3\text{NO}_3\text{S}$ ), sodium hypochlorite solution ( $\text{NaClO}$ ), sulfur powder ( $\text{S}$ ), iron nitrate nonahydrate ( $\text{Fe}(\text{NO}_3)_3 \cdot 9\text{H}_2\text{O}$ ), and iron sulfate heptahydrate ( $\text{FeSO}_4 \cdot 7\text{H}_2\text{O}$ ) were purchased from Aladdin Ltd. (Shanghai, China). Sulfuric acid ( $\text{H}_2\text{SO}_4$ ), hydrogen peroxide ( $\text{H}_2\text{O}_2$ ), hydrochloric acid ( $\text{HCl}$ ), hydrazine monohydrate ( $\text{N}_2\text{H}_4 \cdot \text{H}_2\text{O}$ ), and ethylalcohol ( $\text{C}_2\text{H}_5\text{OH}$ ) were bought from Beijing Chemical Corporation Ltd (Beijing, China). Titanium plate (TP) was purchased from Qingyuan Metal Materials Co., Ltd (Xingtai, China). All reagents used in this work were analytical grade without further purification.

**Preparation of  $\text{FeS}_2@\text{TiO}_2/\text{TP}$ :**  $\text{FeS}_2@\text{TiO}_2/\text{TP}$  was synthesized via a simple three-step procedure. Firstly, the well-cut small pieces ( $2.0 \times 4.0 \text{ cm}^2$ ) titanium plates were sonicated in acetone, ethanol, and distilled water for 15 min, respectively. Then, the Teflon-lined autoclave contained the titanium plates immersing in 40 mL of 5 M NaOH aqueous solution and was put into an electric oven at 180 °C for 24 h. After cooling down to room temperature, the samples were moved out, washed with deionized water and ethanol several times, and dried at 60 °C for 30 min. Then the samples were

immersed in 0.25 M  $\text{Fe}(\text{NO}_3)_3 \cdot 9\text{H}_2\text{O}$  for 1 h in order to exchange  $\text{Na}^+$  with  $\text{Fe}^{3+}$ . The as-prepared Fe-titanate was rinsed with deionized water and ethanol several times. And then they were dried at 60 °C for 30 min. Subsequently, Fe-titanate was annealed in a tube furnace with S powder (0.2 g) at 500 °C under an argon atmosphere for 2 h. After cooling to room temperature,  $\text{FeS}_2@\text{TiO}_2/\text{TP}$  was finally obtained.

**Preparation of  $\text{TiO}_2/\text{TP}$  and  $\text{FeS}_2$ :** Pristine  $\text{TiO}_2/\text{TP}$  nanobelts array was synthesized using the same methods but with 1 M HCl for ion-exchange. The as-prepared  $\text{H}_2\text{Ti}_2\text{O}_5 \cdot \text{H}_2\text{O}$  was then washed with DI water and ethanol several times and dried at 60 °C for 30 min. Subsequently,  $\text{H}_2\text{Ti}_2\text{O}_5 \cdot \text{H}_2\text{O}$  was annealed in a tubular furnace at 500 °C under an argon atmosphere for 2 h. After cooling to room temperature,  $\text{TiO}_2/\text{TP}$  was finally obtained. 0.92 g of  $\text{FeSO}_4$  and 3.2 g of  $\text{Na}_2\text{SO}_3$  were mixed in 40 ml of DI water separately and added into a Teflon lined stainless steel autoclave which was maintained at 180 °C for 2 h. The  $\text{FeS}_2$  was achieved after centrifugation and washing.

**Characterizations:** The crystal structure was confirmed by X-ray diffraction patterns obtained from a LabX XRD-6100 X-ray diffractometer (SHIMADZU, Japan) with a Cu  $K\alpha$  (40 kV, 30 mA) irradiation ( $\lambda = 0.154$  nm). The observation of morphologies and composition were carried out on a GeminiSEM 300 scanning electron microscope (SEM) measurement (ZEISS Sigma 300) at an accelerating voltage of 5 kV equipped with energy dispersive X-ray (EDX). Transmission electron microscopy (TEM) images were collected by a Zeiss Libra 200FE transmission electron microscope operated at 200 kV. X-ray photoelectron spectroscopy (XPS) was performed on an ESCALABMK

II X-ray photoelectron spectrometer using Mg as the exciting source to investigate the surface chemical environment. The Ultraviolet-Visible (UV-Vis) absorbance data was measured by UV-visible Spectrophotometer. Gas chromatography (GC-2014C, SHIMADZU) was used for the quantitative detection of H<sub>2</sub> and N<sub>2</sub>. <sup>1</sup>H NMR spectra were collected on Varian VNMRS 600 MHz (the USA).

**Electrochemical measurements:** All the electrochemical measurements were investigated in an H-shape reactor separated by a treated Nafion 117 membrane by using the CHI660E electrochemical workstation (Chenhua, Shanghai) with a standard three-electrode setup (FeS<sub>2</sub>@TiO<sub>2</sub> (1 × 0.5 cm<sup>2</sup>) as the working electrode, a Pt as the counter electrode, and a Hg/HgO as the reference electrode). The electrolyte solution was Ar-saturated 0.1 M NaOH with 0.1 M NO<sub>3</sub><sup>-</sup>. All the potentials reported in our work were converted to reversible hydrogen electrode (RHE) scale via calibration with the following equation: E (RHE) = E (vs. Hg/HgO) + 0.0591 × pH + 0.098 V, and the current density was normalized by the geometric surface area.

**Determination of NH<sub>3</sub>:** The concentration of produced NH<sub>3</sub> was determined by spectrophotometry measurement with the indophenol blue method.<sup>1</sup> The indophenol blue method is employed by the following Bethelot reaction equation.<sup>2,3</sup>

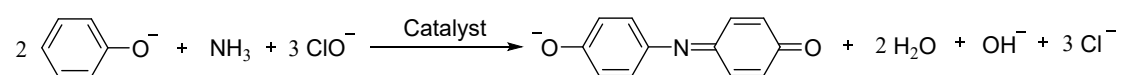

The ammonia reacts with phenol and hypochlorite in alkaline solution. The generated indophenol product is in blue color. The obtained electrolyte was firstly diluted 50 times

for further test. In detail, 2 mL of the diluted catholyte was obtained from the cathodic chamber and mixed with 2 mL of the 1 M NaOH solution that contained 5% salicylic acid and 5% sodium citrate. Then, 1 mL of 0.05 M NaClO and 0.2 mL of 1 wt%  $C_5FeN_6Na_2O$  were dropped into the collected electrolyte solution. After standing at room temperature for 2 h, the ultraviolet-visible absorption spectrum was measured. The concentration-absorbance curve was calibrated using the standard  $NH_4Cl$  solution with  $NH_3$  concentrations of 0.1, 0.25, 0.5, 1.5, 2.0, 3.0 and 4.0  $\mu g mL^{-1}$  in 0.1 M NaOH. The absorbance at 655 nm was measured to quantify the  $NH_3$  concentration using standard  $NH_4Cl$  solutions ( $y = 0.4378x + 0.02455$ ,  $R^2 = 0.9998$ ).

**Determination of  $NO_2^-$ :** The  $NO_2^-$  concentration was analyzed using the Griess test.<sup>4</sup> The Griess reagent was prepared by dissolving 0.1 g N-(1-naphthyl) ethylenediamine dihydrochloride, 1.0 g sulfonamide, and 2.94 mL  $H_3PO_4$  in 50 mL deionized water. In a typical colorimetric assay, the 1.0 mL Griess reagent was mixed with the 1.0 mL nitrite-containing solution and 2.0 mL  $H_2O$  and allowed to react at room temperature for 10 mins, in which sulfonamide reacts with  $NO_2^-$  to form a diazonium salt and then further reacts with the amine to form an azo dye (magenta). The absorbance at 540 nm was measured to quantify the  $NO_2^-$  concentration with a standard curve of  $NO_2^-$  ( $y = 2.0295x + 0.096$ ,  $R^2 = 0.9998$ ).

**Determination of  $N_2H_4$ :** In this work, we used the method of Watt and Chrisp<sup>5</sup> to determine the concentration of produced  $N_2H_4$ . The chromogenic reagent was a mixed solution of 5.99 g  $C_9H_{11}NO$ , 30 mL HCl and 300 mL  $C_2H_5OH$ . In detail, 1 mL

electrolyte was added into 1 mL prepared color reagent and stirred for 15 min in the dark. The absorbance at 455 nm was measured to quantify the N<sub>2</sub>H<sub>4</sub> concentration with a standard curve of hydrazine ( $y = 0.6876x + 0.1068$ ,  $R^2 = 0.9998$ ).

**Determination of FE and NH<sub>3</sub> yield:** FE toward NH<sub>3</sub> via NO<sub>3</sub>RR is calculated by the following equation:

$$FE = (8 \times F \times [\text{NH}_3] \times V) / (M_{\text{NH}_3} \times Q) \times 100\%$$

NH<sub>3</sub> yield is calculated by the following equation:

$$\text{NH}_3 \text{ yield} = ([\text{NH}_3] \times V) / (M_{\text{NH}_3} \times t \times A)$$

Where F is the Faradic constant (96485 C mol<sup>-1</sup>), [NH<sub>3</sub>] is the measured NH<sub>3</sub> concentration, V is the volume of electrolyte in the anode compartment (80 mL), M<sub>NH<sub>3</sub></sub> is the molar mass of NH<sub>3</sub>, Q is the total quantity of applied electricity, t is the electrolysis time and A is the loaded area of catalyst (1 × 0.5 cm<sup>2</sup>).

**Computational details:** Spin-polarized density functional theory (DFT) method was employed in all computations.<sup>6,7</sup> The core electrons were described using the projector-augmented-wave (PAW) method, while the Perdew–Burke–Ernzerhof (PBE) functional with in the generalized gradient approximation (GGA) was utilized to treat the electronic exchange-correlation energy.<sup>8</sup> The spin polarization was adopted and its influence on the energy minima were also considered for all calculations.<sup>9</sup> All atomic structures were optimized until the energy and force reached the convergence thresholds of 10<sup>-4</sup> eV and -0.02 eV/ Å, respectively. The energy cutoff was set to 450 eV. A Monkhorst-Pack k-mesh with a 4 × 4 × 1 k-point grid was used for structural

optimization and frequency calculations, while  $6 \times 6 \times 1$  k-point grid was utilized for electronic structure calculations. The Gibbs free energy change ( $\Delta G$ ) involved in each elementary reaction calculation was calculated based on terms of the computational hydrogen electrode model proposed by Nørskov et al.<sup>10,11</sup> The calculation formula is:  $\Delta G = \Delta E + \Delta ZPE - T\Delta S + eU + \Delta G_{\text{pH}}$ . Here,  $\Delta E$  is the DFT-calculated total energy,  $T$  is set to 298.15 K and the entropy  $S$  is computed by fixing the catalyst base as the premise.  $U$  is the electrode potential versus reversible hydrogen electrode (RHE).  $\Delta G_{\text{pH}}$  represents the correction of the free energy because of the variations in pH conditions.  $\Delta G_{\text{max}}$  represents the maximum  $\Delta G$  among each elementary reaction.

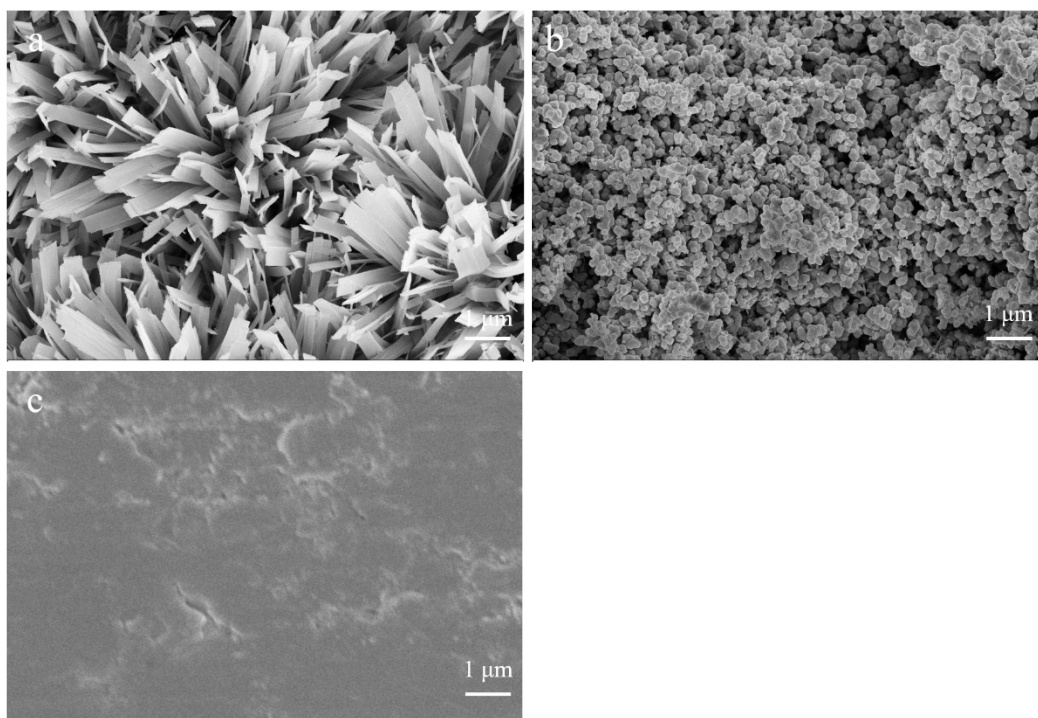

**Fig. S1.** SEM images of (a)  $\text{TiO}_2/\text{TP}$ , (b)  $\text{FeS}_2$  nanoparticles, and (b) TP.

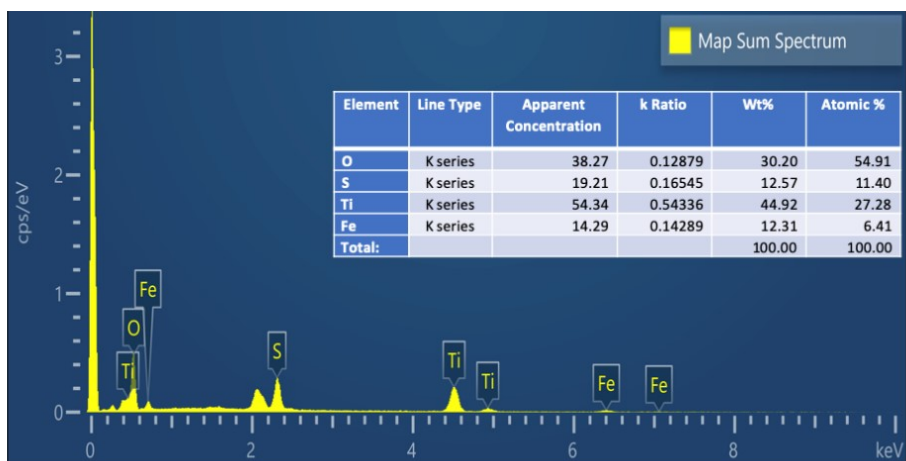

**Fig. S2.** Atomic ratios of the elements in FeS<sub>2</sub>@TiO<sub>2</sub>/TP.



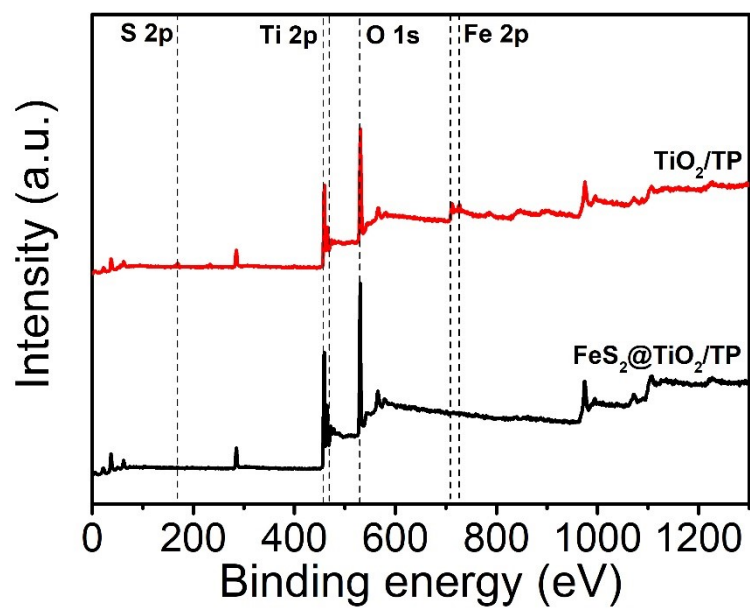

**Fig. S3.** XPS spectra of TiO<sub>2</sub>/TP and FeS<sub>2</sub>@TiO<sub>2</sub>/TP.

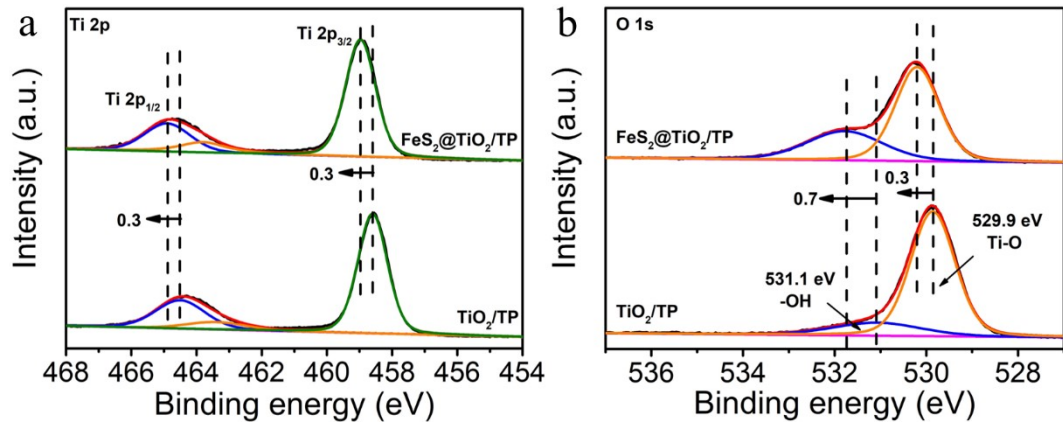

**Fig. S4.** XPS spectra of pristine TiO<sub>2</sub>/TP and FeS<sub>2</sub>@TiO<sub>2</sub>/TP in the (a) Ti 2p and (b) O 1s.

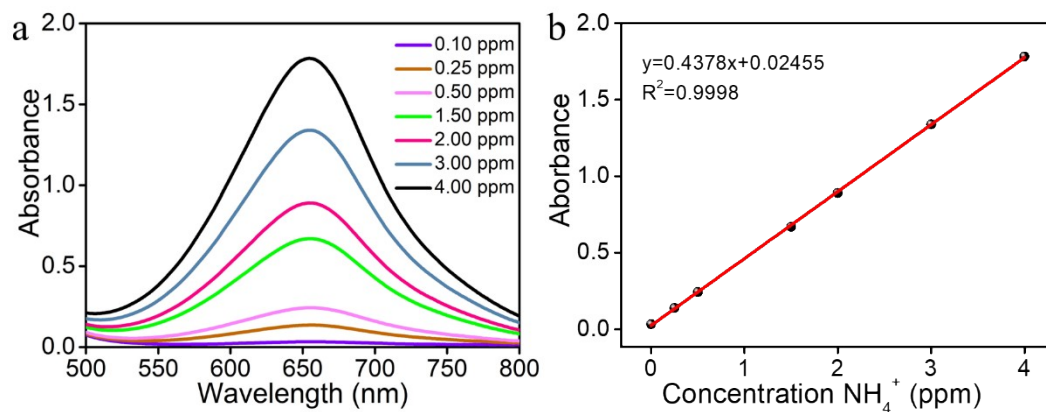

**Fig. S5.** (a) UV-Vis absorption spectra of indophenol assays kept with different concentrations of  $\text{NH}_4^+$  after incubated for 2 h at room temperature. (b) Calibration curve used for estimation of  $\text{NH}_4^+$  concentration.

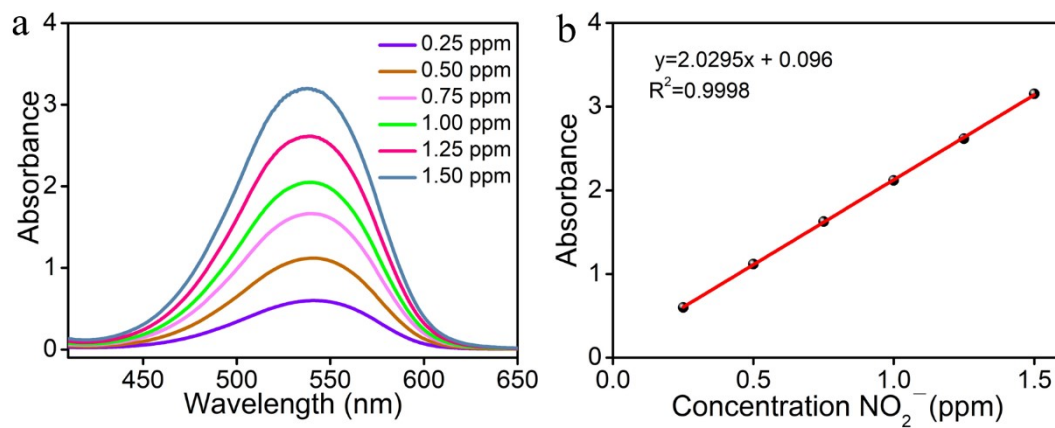

**Fig. S6.** UV-Vis absorption spectra of various  $\text{NO}_2^-$  concentrations after incubated for 10 mins at room temperature. (b) Calibration curve used for quantification of  $\text{NO}_2^-$  concentration.

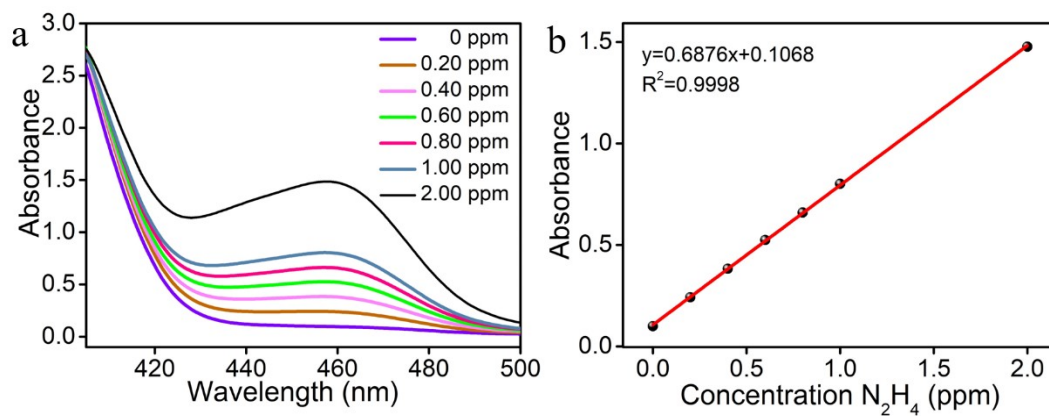

**Fig. S7.** (a) UV-Vis absorption spectra of various  $N_2H_4$  concentrations after incubated for 15 mins at room temperature. (b) Calibration curve used for calculation of  $N_2H_4$  concentration.

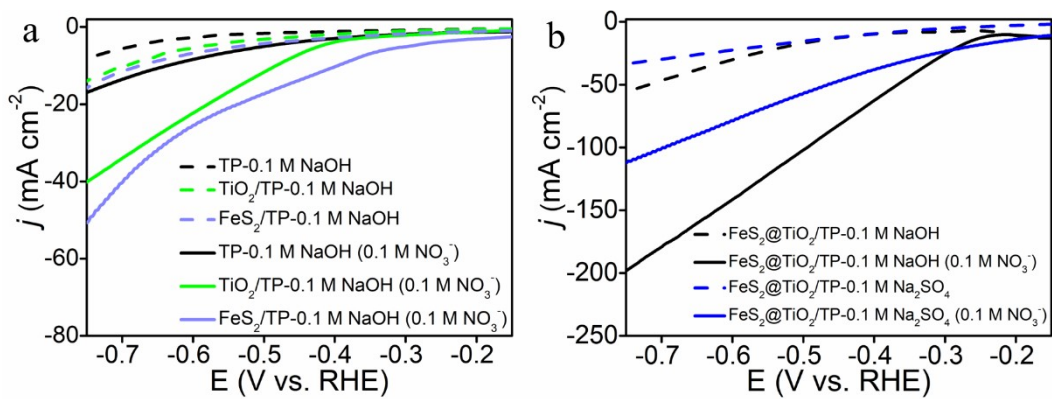

**Fig. S8.** (a) LSV curves of TP, TiO<sub>2</sub>/TP and FeS<sub>2</sub>/TP in 0.1 M NaOH with and without 0.1 M NO<sub>3</sub><sup>-</sup>. (b) LSV curves of FeS<sub>2</sub>@TiO<sub>2</sub>/TP in alkaline and neutral electrolyte with and without 0.1 M NO<sub>3</sub><sup>-</sup>.

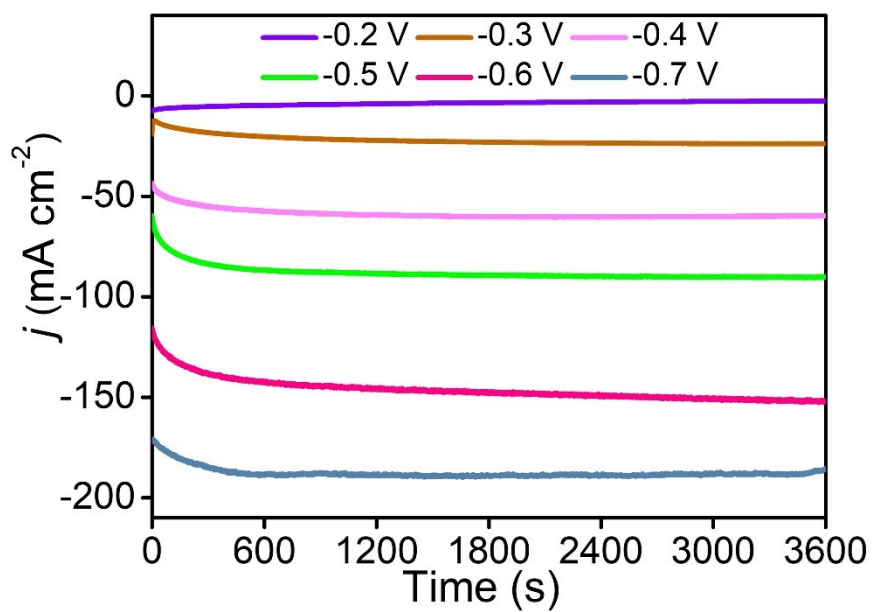

**Fig. S9.** Chronoamperometry curves of FeS<sub>2</sub>@TiO<sub>2</sub>/TP at different given potentials.

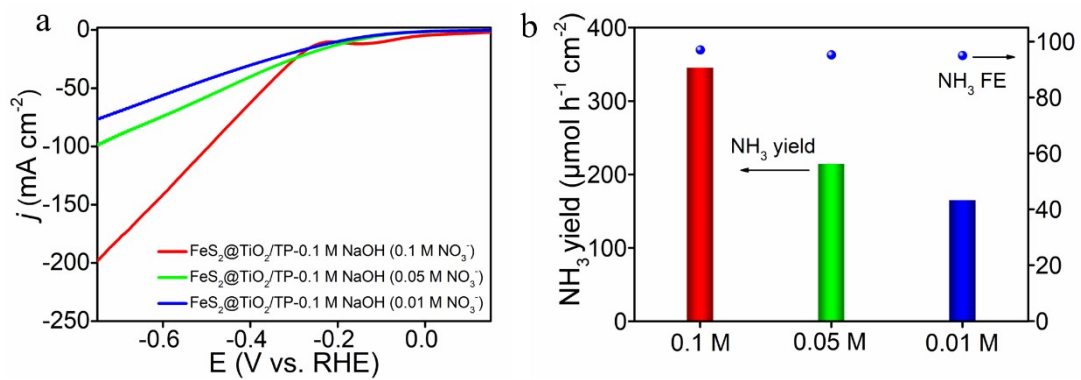

**Fig. S10.** (a) LSV curves and (b)  $\text{NH}_3$  yields and FEs in 0.1 M NaOH with different  $\text{NO}_3^-$  concentrations.



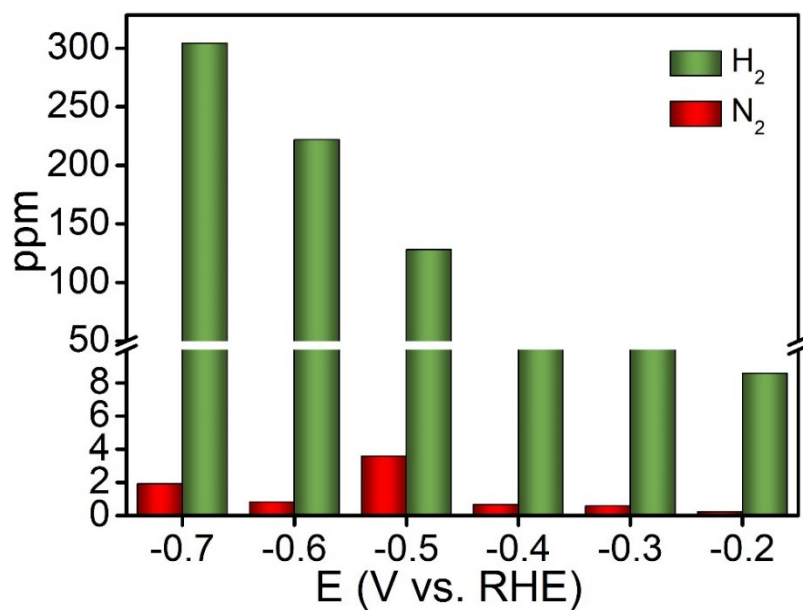

**Fig. S11.** The concentrations of gas byproducts H<sub>2</sub> and N<sub>2</sub> detected by gas chromatography.

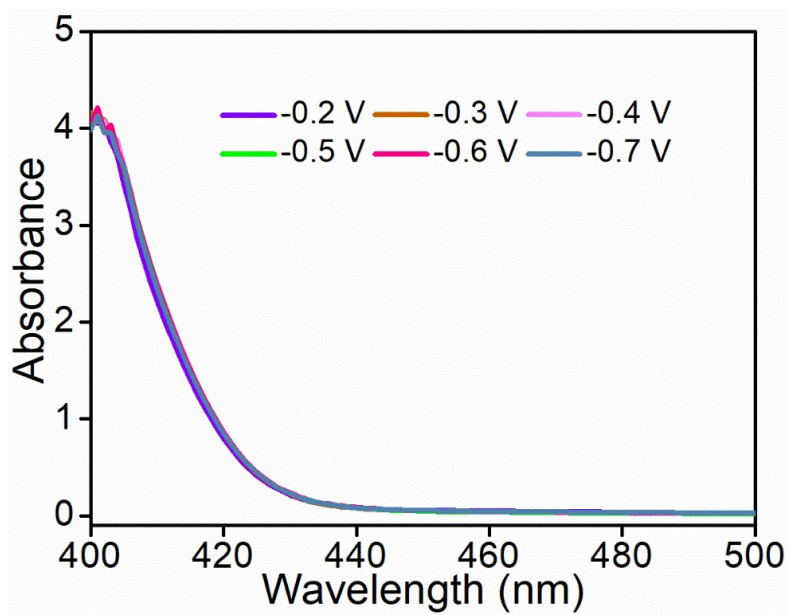

**Fig. S12.** UV-Vis absorption spectra of produced  $N_2H_4$ .

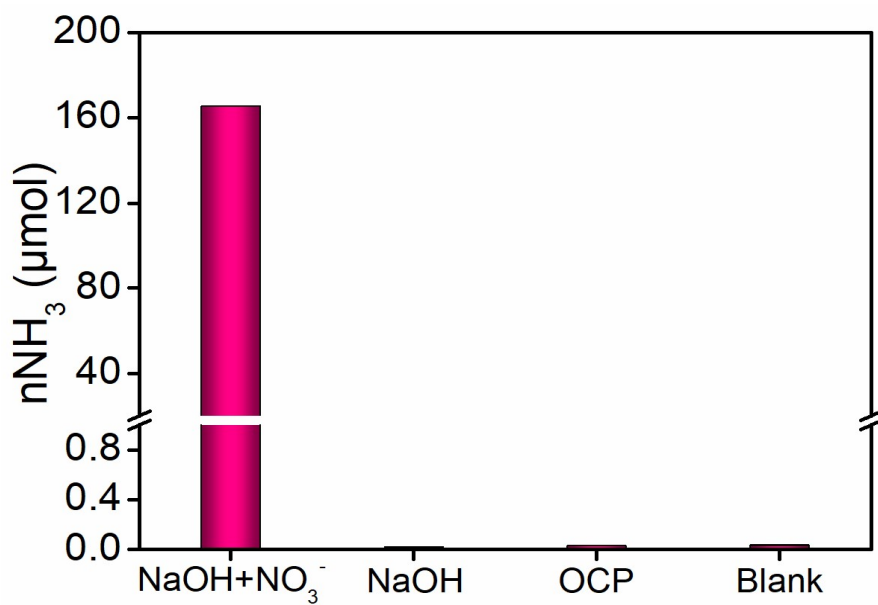

**Fig. S13.** Comparison of the amount of produced  $\text{NH}_3$  under four different conditions.

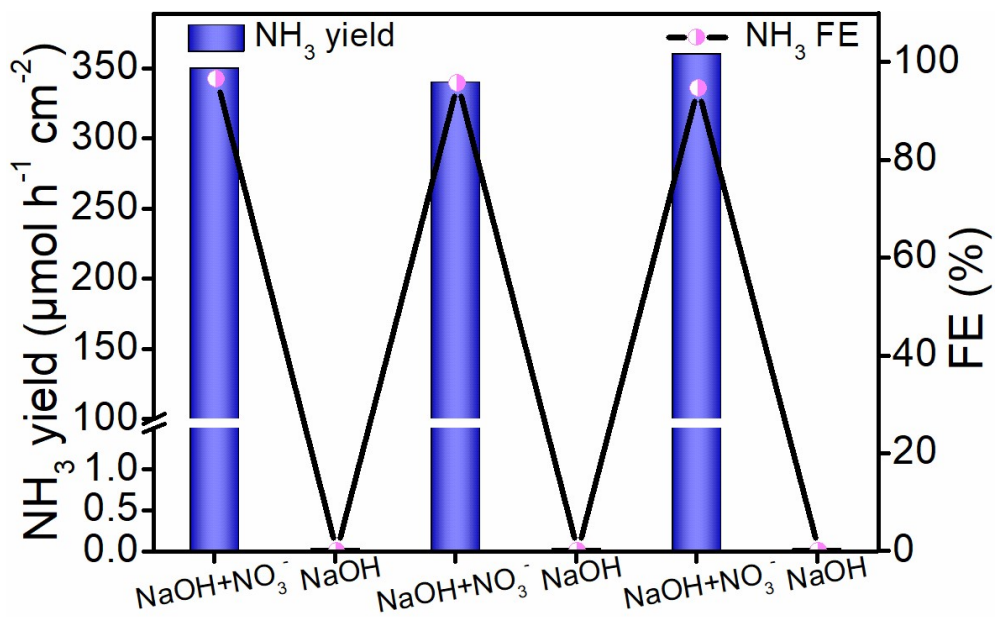

**Fig. S14.** NH<sub>3</sub> yields and FEs of FeS<sub>2</sub>@TiO<sub>2</sub>/TP during the alternating cycling test between 0.1 M NaOH with and without additional 0.1 M NO<sub>3</sub><sup>-</sup>.

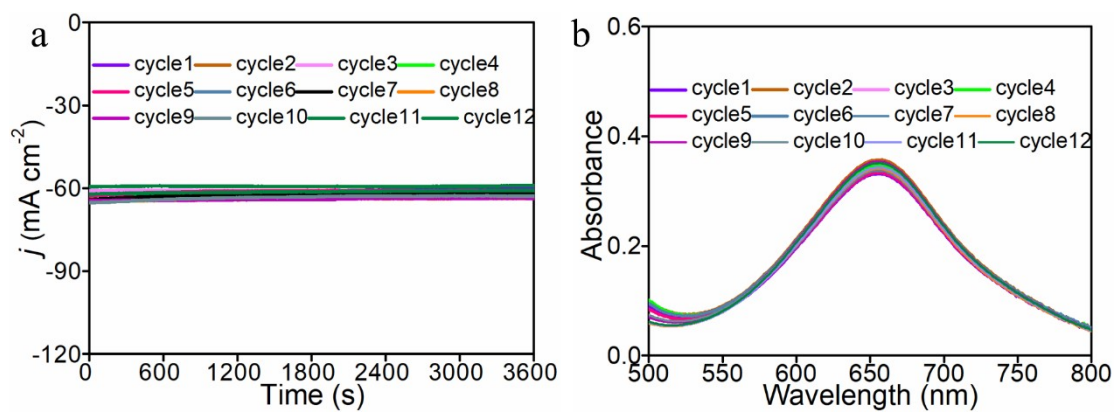

**Fig. S15.** (a) Chronoamperometry curves and (b) corresponding UV-Vis absorption spectra of FeS<sub>2</sub>@TiO<sub>2</sub>/TP for electrogenerated NH<sub>3</sub> during cycling tests at -0.4 V.

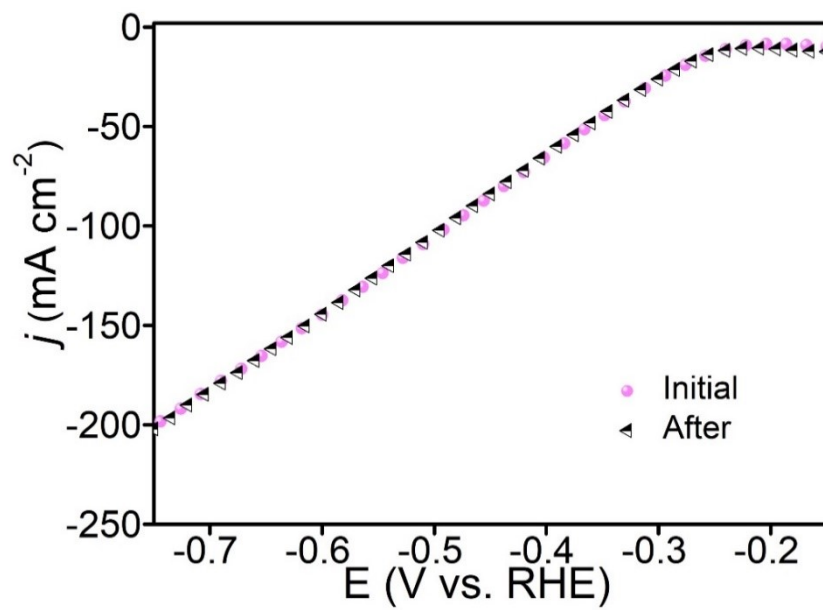

**Fig. S16.** LSV curves of FeS<sub>2</sub>@TiO<sub>2</sub>/TP before and after 24-h electrolysis.

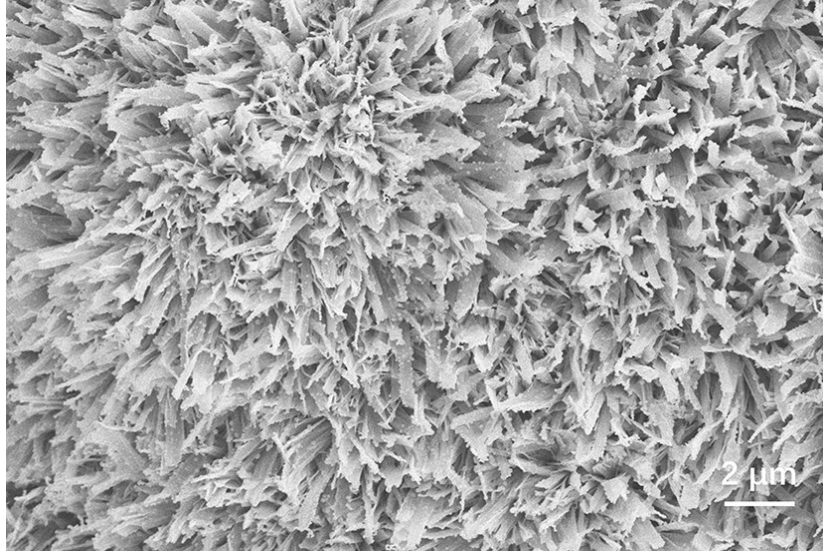

**Fig. S17.** SEM image of FeS<sub>2</sub>@TiO<sub>2</sub>/TP after 24-h electrolysis.

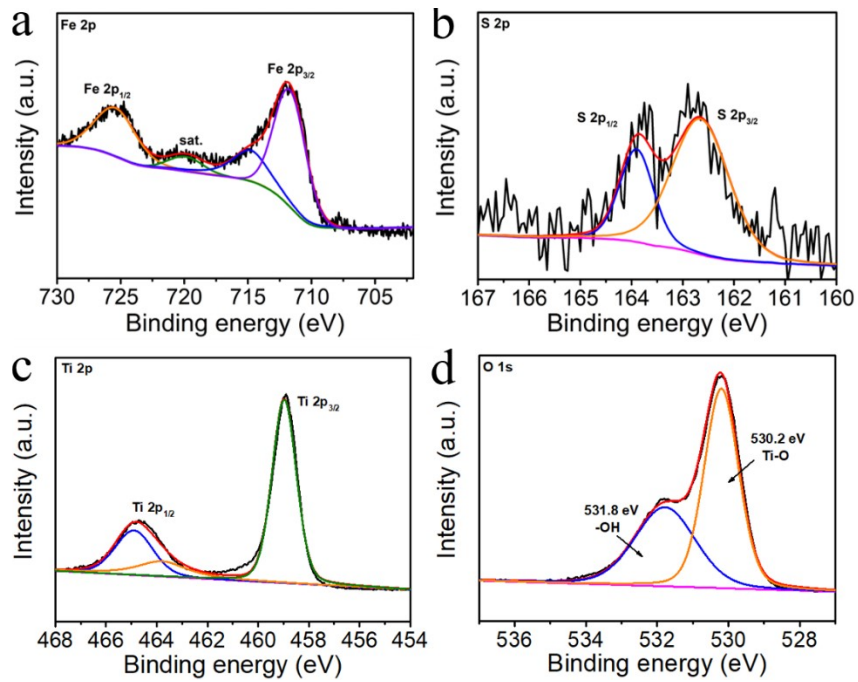

**Fig. S18.** (a) XPS spectra of post-test  $\text{FeS}_2@/\text{TiO}_2/\text{TP}$ : (a) Fe 2p, (b) S 2p, (c) Ti 2p, and (d) O 1s.



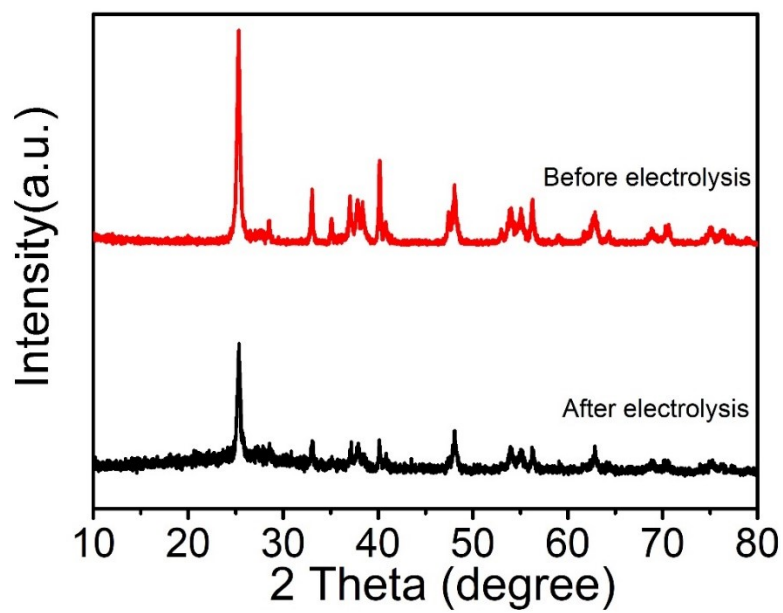

**Fig. S19.** XRD patterns of FeS<sub>2</sub>@TiO<sub>2</sub>/TP before and after 24-h electrolysis.

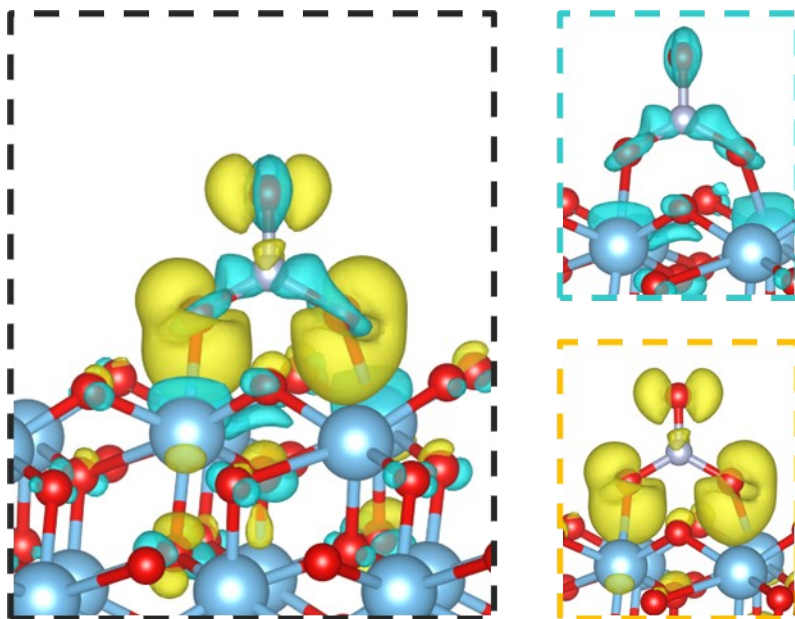

**Fig. S20.** Charge density difference of TiO<sub>2</sub> with adsorbed NO<sub>3</sub><sup>-</sup>, where yellow and cyan color indicate electron accumulation and depletion, respectively. The isosurface value was set to 0.000194Å<sup>-3</sup>.

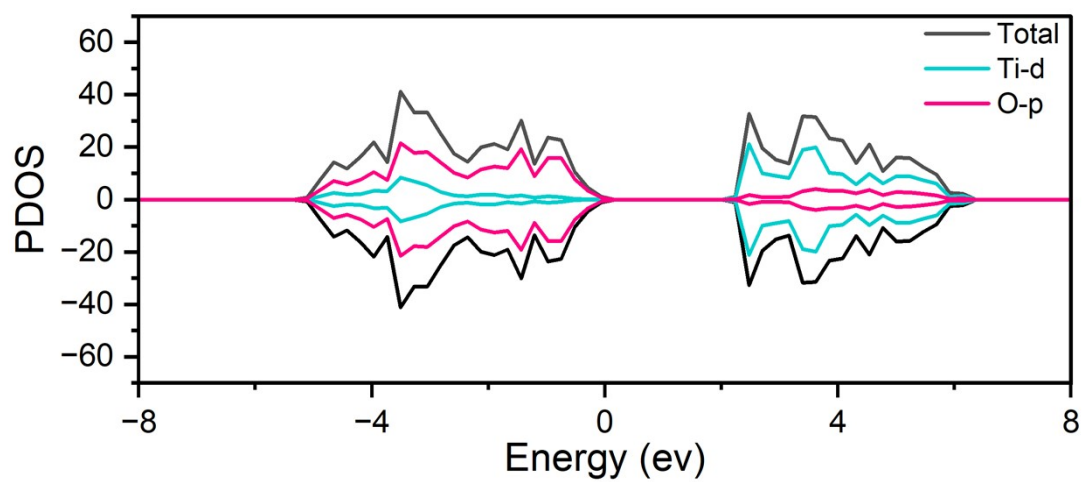

**Fig. S21.** Partial density of states (PDOS) of TiO<sub>2</sub>.

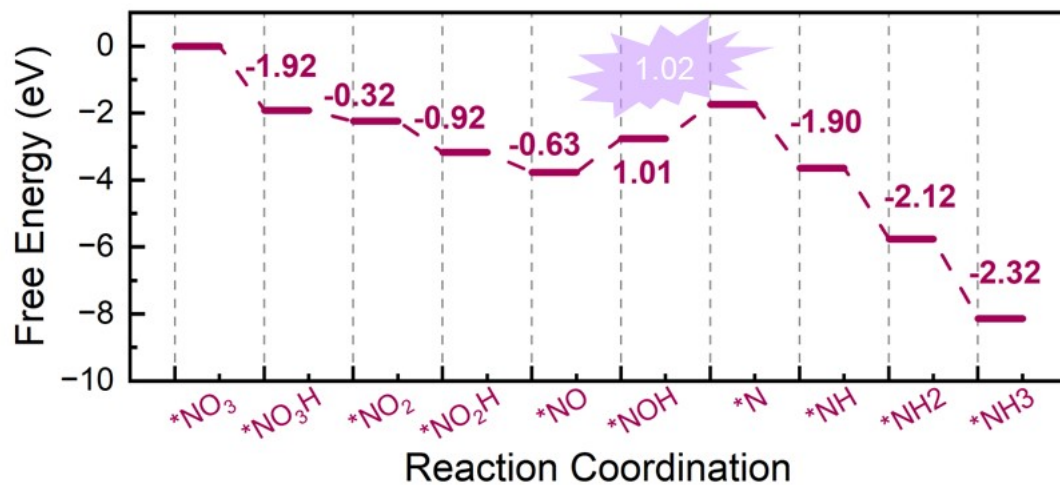

**Fig. S22.** Gibbs free energy diagrams for NO<sub>3</sub>RR on TiO<sub>2</sub>.

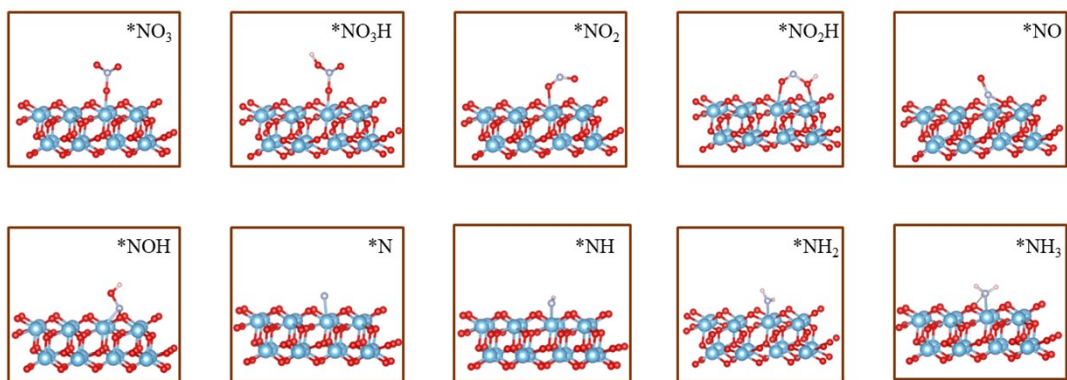

**Fig. S23.** Configuration transformation of intermediates during NO<sub>3</sub>RR on TiO<sub>2</sub>.

**Table S1.** Comparison of catalytic performance of FeS<sub>2</sub>@TiO<sub>2</sub>/TP with other reported NO<sub>3</sub>RR electrocatalysts.

| Catalyst                               | Electrolyte                                                                       | NH <sub>3</sub> yield@Potential<br>(V vs. RHE)                 | FE@Potential<br>(V vs. RHE)                                      | Ref.      |
|----------------------------------------|-----------------------------------------------------------------------------------|----------------------------------------------------------------|------------------------------------------------------------------|-----------|
| FeS <sub>2</sub> @TiO <sub>2</sub> /TP | 0.1 M NaOH<br>(0.1 M NO <sub>3</sub> <sup>-</sup> )                               | 860.3 μmol h <sup>-1</sup> cm <sup>-2</sup> @-0.7              | 97.0%@-0.4                                                       | This work |
| Cu clusters/TiO <sub>2-x</sub>         | 0.5 M Na <sub>2</sub> SO <sub>4</sub><br>(200 ppm NO <sub>3</sub> <sup>-</sup> )  | 0.1143 mmol h <sup>-1</sup> mg <sup>-1</sup> @-0.75            | 81.34%@-0.75                                                     | 12        |
| TiO <sub>2-x</sub>                     | 0.5 M Na <sub>2</sub> SO <sub>4</sub><br>(50 ppm NO <sub>3</sub> <sup>-</sup> )   | 0.045 mmol h <sup>-1</sup> mg <sup>-1</sup> @-0.95             | 85.0%@-0.95                                                      | 13        |
| Cu/TNTA                                | 0.1 M Na <sub>2</sub> SO <sub>4</sub><br>(50 mgN/L NO <sub>3</sub> <sup>-</sup> ) |                                                                | 84.3%@-0.65<br>(NO <sub>3</sub> <sup>-</sup> removal efficiency) | 14        |
| Ni NP                                  | 1 M NaOH<br>(20 mM NO <sub>3</sub> <sup>-</sup> )                                 | /                                                              | 46.3%@-0.27                                                      | 15        |
| Fe SAC                                 | 1 M KOH<br>(0.1 M NO <sub>3</sub> <sup>-</sup> )                                  | /                                                              | 86%@-0.21                                                        | 16        |
| Cu                                     | 1 M NaOH<br>(0.1 M NO <sub>3</sub> <sup>-</sup> )                                 | /                                                              | 79%                                                              | 17        |
| Cu <sub>50</sub> Ni <sub>50</sub>      | 1 M KOH<br>(10 mM NO <sub>3</sub> <sup>-</sup> )                                  | /                                                              | 84 ± 2%                                                          | 18        |
| Pd facets                              | 0.1 M NaOH<br>(20 mM NO <sub>3</sub> <sup>-</sup> )                               | 18 μmol h <sup>-1</sup> cm <sup>-2</sup> @-0.2                 | 35%@-0.2                                                         | 19        |
| In-S-G                                 | 1 M KOH<br>(0.1 M NO <sub>3</sub> <sup>-</sup> )                                  | 22 μmol h <sup>-1</sup> mg <sub>cat.</sub> <sup>-1</sup> @-0.5 | 75%@-0.5                                                         | 20        |
| Pd/TiO <sub>2</sub>                    | 0.5 M NaOH<br>(0.25 M NO <sub>3</sub> <sup>-</sup> )                              | 66 μmol h <sup>-1</sup> cm <sup>-2</sup> @-0.7                 | 92%@-0.7                                                         | 21        |
| BC <sub>2</sub> N/Pd                   | 0.1 M KOH<br>(0.25 M NO <sub>3</sub> <sup>-</sup> )                               | 100 μmol h <sup>-1</sup> cm <sup>-2</sup> @-0.7                | 97.42%@-0.3                                                      | 22        |
| Fe-PPy SACs                            | 0.1 M KOH<br>(0.1 M NO <sub>3</sub> <sup>-</sup> )                                | 160 μmol h <sup>-1</sup> cm <sup>-2</sup> @-0.7                | ~100%@-0.3                                                       | 23        |
| BCN@Ni                                 | 0.1 M KOH<br>(0.1 M NO <sub>3</sub> <sup>-</sup> )                                | 140 μmol h <sup>-1</sup> cm <sup>-2</sup> @-0.5                | 91.15%@-0.3                                                      | 24        |
| Ni <sub>3</sub> B@NiB <sub>2.74</sub>  | 0.1 M KOH<br>(0.1 M NO <sub>3</sub> <sup>-</sup> )                                | 200 μmol h <sup>-1</sup> cm <sup>-2</sup> @-0.3                | ~100%@-0.3                                                       | 25        |

|                                  |                                                                                 |                                                                 |             |    |
|----------------------------------|---------------------------------------------------------------------------------|-----------------------------------------------------------------|-------------|----|
| BCN-Cu                           | 0.1 M KOH<br>(100 mM NO <sub>3</sub> <sup>-</sup> )                             | 110 μmol h <sup>-1</sup> cm <sup>-2</sup> @-0.5                 | 98.23%@-0.5 | 26 |
| ZnCo <sub>2</sub> O <sub>4</sub> | 0.1 M KOH<br>(0.1 M NO <sub>3</sub> <sup>-</sup> )                              | 120 μmol h <sup>-1</sup> mg <sub>cat.</sub> <sup>-1</sup> @-0.6 | 95.4%@-0.4  | 27 |
| Co/CoO NSA                       | 0.1 M K <sub>2</sub> SO <sub>4</sub><br>(200 ppm NO <sub>3</sub> <sup>-</sup> ) | 200 μmol h <sup>-1</sup> cm <sup>-2</sup> @-0.65                | 93.8%@-0.65 | 28 |

---

## References

- 1 D. Zhu, L. Zhang, R. E. Ruther and R. J. Hamers, *Nat. Mater.*, 2013, **12**, 836-841.
- 2 Y. Zhao, R. Shi, X. Bian, C. Zhou, Y. Zhao, S. Zhang, F. Wu, G. I. N. Waterhouse, L. Z. Wu, C. H. Tung and T. Zhang, *Adv. Sci.*, 2019, **6**, 1802109.
- 3 D. Yao, C. Tang, L. Li, B. Xia, A. Vasileff, H. Jin, Y. Zhang and S. Z. Qiao, *Adv. Energy Mater.*, 2020, **10**, 2001289.
- 4 G. W. Watt and J. D. Chrisp, *Anal. Chem.*, 1952, **24**, 2006-2008.
- 5 G. Kresse and J. Hafner, *Phys. Rev. B*, 1994, **49**, 14251-14269.
- 6 Q. Zhou, F. Gong, Y. Xie and R. Xiao, *Green Energy Environ.*, 2022, <https://doi.org/10.1016/j.gee.2022.06.005>.
- 7 Q. Zhou, F. Gong, Y. Xie, D. Xia, Z. Hu, S. Wang, L. Liu and R. Xiao, *Fuel*, 2022, **310**, 122442.
- 8 B. Wang, T. Li, F. Gong, M. H. D. Othman and R. Xiao, *Fuel Process. Technol.*, 2022, **235**, 107380.
- 9 X. Sun, F. Gong, M. Hao, L. Wu, C. Yin, Z. Sun and R. Xiao, *Appl. Surf. Sci.*, 2022, **582**, 152484.
- 10 Y. Qiu, E. Fu, F. Gong and R. Xiao, *Int. J. Hydrogen Energ.*, 2022, **47**, 5044-5052.
- 11 J. Chen, Q. Zhou, L. Yue, D. Zhao, L. Zhang, Y. Luo, Q. Liu, N. Li, A. A. Alshehri, M. S. Hamdy, F. Gong and X. Sun, *Chem. Commun.*, 2022, **58**, 3787-3790.
- 12 X. Zhang, C. Wang, Y. Guo, B. Zhang, Y. Wang and Y. Yu, *J. Mater. Chem. A.*, 2022, **10**, 6448-6453.
- 13 R. Jia, Y. Wang, C. Wang, Y. Ling, Y. Yu and B. Zhang, *ACS Catal.*, 2022, **10**, 3533-3540.
- 14 Q. Song, S. Zhang, X. Hou, J. Li, L. Yang, X. Liu and M. Li, *J. Hazard. Mater.*, 2022, **438**, 129455.
- 15 L. Mattarozzi, S. Cattarin, N. Comisso, P. Guerriero, M. Musiani, L. Vázquez-Gómez and E. Verlato, *Electrochim. Acta*, 2013, **89**, 488-496.
- 16 Z. Wu, M. Karamad, X. Yong, Q. Huang, D. A. Cullen, P. Zhu, C. Xia, Q. Xiao, M. Shakouri, F. Chen, J. Y. Kim, Y. Xia, K. Heck, Y. Hu, M. S. Wong, Q. Li, I.



- 
- Gates, S. Siahrostami and H. Wang, *Nat. Commun.*, 2021, **12**, 2870.
- 17 D. Reyter, G. Chamoulaud, D. Bélanger and L. Roué, *J. Electroanal. Chem.*, 2006, **596**, 13-24.
- 18 Y. Wang, A. Xu, Z. Wang, L. Huang, J. Li, F. Li, J. Wicks, M. Luo, D. H. Nam, C. Tan, Y. Ding, J. Wu, Y. Lum, C. T. Dinh, D. Sinton, G. Zheng and E. H. Sargent, *J. Am. Chem. Soc.*, 2020, **142**, 5702-5708.
- 19 J. Lim, C. Liu, J. Park, Y. Liu, T. P. Senftle, S. W. Lee and M. C. Hatzell, *ACS Catal.*, 2021, **11**, 7568-7577.
- 20 F. Lei, W. Xu, J. Yu, K. Li, J. Xie, P. Hao, G. Cui and B. Tang, *Chem. Eng. J.*, 2021, **426**, 131317.
- 21 Y. Guo, R. Zhang, S. Zhang, Y. Zhao, Q. Yang, Z. Huang, B. Dong and C. Zhi, *Energy Environ. Sci.*, 2021, **14**, 3938-3944.
- 22 X. Li, X. Zhao, Y. Zhou, J. Hu, H. Zhang, X. Hu and G. Hu, *Appl. Surf. Sci.*, 2022, **584**, 152556.
- 23 P. Li, Z. Jin, Z. Fang and G. Yu, *Energy Environ. Sci.*, 2021, **14**, 3522-3531.
- 24 X. Zhao, Z. Zhu, Y. He, H. Zhang, X. Zhou, W. Hu, M. Li, S. Zhang, Y. Dong, X. Hu, A. V. Kuklin, G. V. Baryshnikov, H. Ågren, T. Wågberg and G. Hu, *Chem. Eng. J.*, 2022, **433**, 133190.
- 25 L. Li, C. Tang, X. Cui, Y. Zheng, X. Wang, H. Xu, S. Zhang, T. Shao, K. Davey and S. Qiao, *Angew. Chem. Int. Ed.*, 2021, **60**, 14131-14137.
- 26 X. Zhao, X. Jia, Y. He, H. Zhang, X. Zhou, H. Zhang, S. Zhang, Y. Dong, X. Hu, A. V. Kuklin, G. V. Baryshnikov, H. Ågren and G. Hu, *Appl. Mater. Today*, 2021, **25**, 101206.
- 27 P. Huang, T. Fan, X. Ma, J. Zhang, Z. Chen and X. Yi, *ChemSusChem*, 2022, **15**, e202102049.
- 28 Y. Yu, C. Wang, Y. Yu, Y. Wang and B. Zhang, *Sci. China Chem*, 2020, **63**, 1469-1476.
